# Supplementary material for: Synthesis and characterization of perovskite-type BaMg0.33Nb0.67−xFexO3−δ for potential high temperature CO2 sensors application
Source: Royal Society of Chemistry journal article supplement (doi:10.1039/c3ta10572e), 2013-01-01
Supplement: c3ta10572e.pdf [file c3ta10572e.pdf]

Cite this: DOI: 10.1039/c0xx00000x

www.rsc.org/xxxxxx

**ARTICLE TYPE**

## Synthesis and characterization of perovskite-type $\text{BaMg}_{0.33}\text{Nb}_{0.67-x}\text{Fe}_x\text{O}_{3-\delta}$ for potential high temperature $\text{CO}_2$ sensors application

Ramaiyan Kannan, Suresh Mulmi and Venkataraman Thangadurai\*

*Received (in XXX, XXX) XthXXXXXXXXXX 20XX, Accepted Xth XXXXXXXXXXXX 20XX*

DOI: 10.1039/b000000x

### Supporting Information

1. Lattice constant variation as a function of Fe incorporation
2. EDX data of as-prepared samples
3. FT-IR spectra of BMN and BMNF samples before and after  $\text{CO}_2$  treatment
- 10 4. FT-IR spectra of the as-prepared BMN and BMNF samples
5. TGA of the as-prepared BMN and BMNF samples
6. FT-IR spectra of the  $\text{H}_2\text{O}$  vapor treated BMN and BMNF samples
7. Response and recovery transients of BMNF17 and BMNF33 in synthetic air

## 1. Lattice constant variation as a function of Fe incorporation

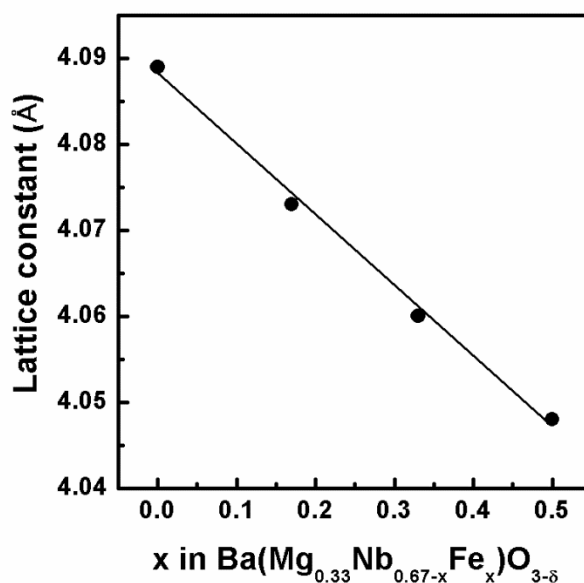

Figure S1. Variation of lattice constant as a function of Fe concentration in Ba(Mg<sub>0.33</sub>Nb<sub>0.67-x</sub>Fe<sub>x</sub>)O<sub>3-δ</sub>.

5 δ.

## 2. EDX data of as-prepared samples

Table S1. EDX data obtained on the as-prepared perovskite-type Ba(Mg<sub>0.33</sub>Nb<sub>0.67-x</sub>Fe<sub>x</sub>)O<sub>3-δ</sub> (x = 0, 0.17, 0.33, 0.50).

10

| Element | Atomic percentage (%) |        |        |        |
|---------|-----------------------|--------|--------|--------|
|         | BMN                   | BMNF17 | BMNF33 | BMNF50 |
| Ba      | 25                    | 25     | 32     | 22     |
| Mg      | 8                     | 12     | 7      | 6      |
| Nb      | 18                    | 15     | 11     | 7      |
| Fe      | ---                   | 6      | 11     | 12     |
| O       | 49                    | 42     | 39     | 53     |

### 3. FT-IR spectra of BMN and BMNF samples before and after CO<sub>2</sub> treatment

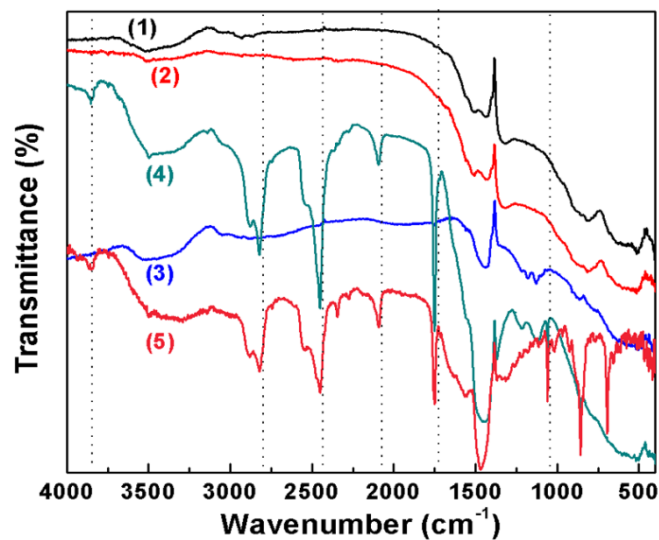

Figure S2. FT-IR spectra obtained on (1) BMN before CO<sub>2</sub> treatment (2) BMN after CO<sub>2</sub> treatment, (3) BMNF33 before CO<sub>2</sub> treatment, (4) BMNF33 after CO<sub>2</sub> treatment and (5) FT-IR of BaCO<sub>3</sub> commercial powder obtained from Alfa Aesar.

### 4. FT-IR spectra of the as-prepared BMN and BMNF samples

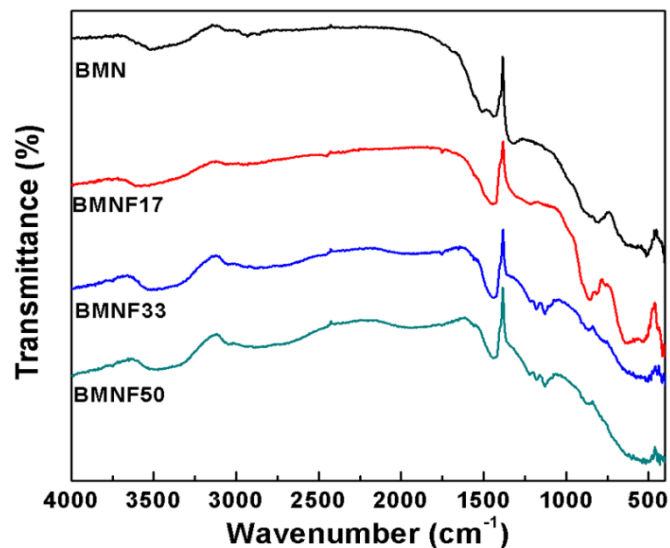

Figure S3. FT-IR spectra obtained on as-prepared BMN and BMNF samples.

## 5. TGA of the as-prepared BMN and BMNF samples

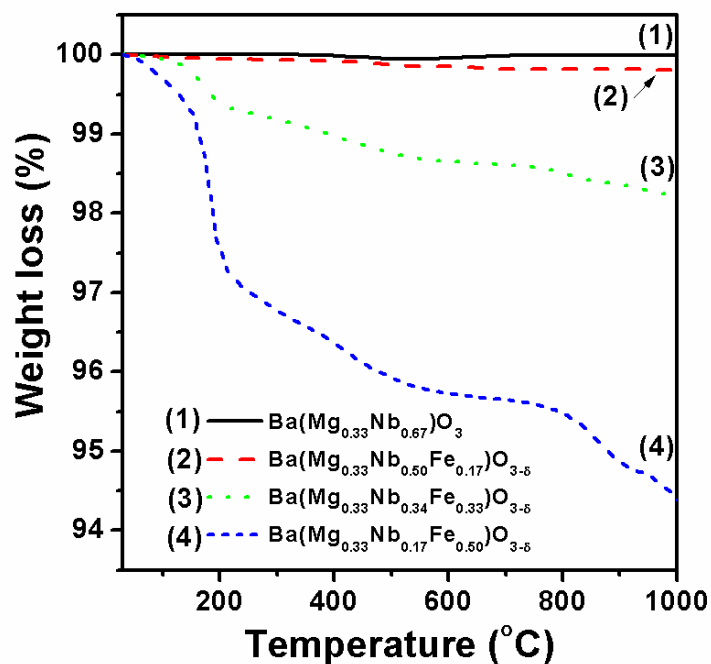

Figure S4. TGA plots obtained on as-prepared BMN and BMNF samples.

5

## 6. FT-IR spectra of the H<sub>2</sub>O vapor treated BMN and BMNF samples

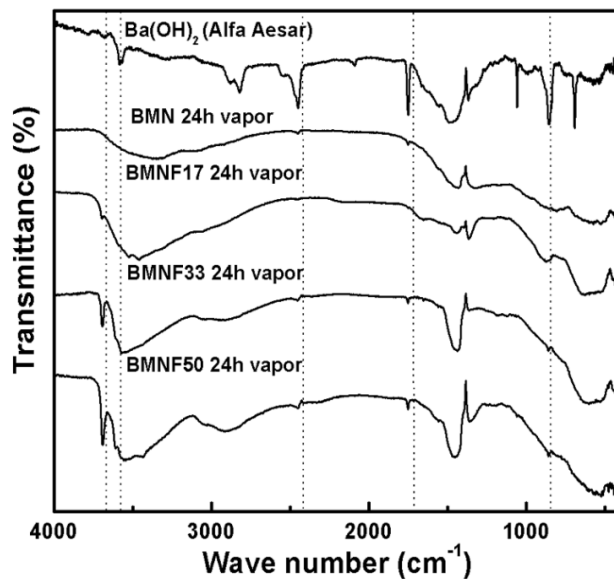

Figure S5. FT-IR spectra obtained BMN and BMNF samples after exposure to H<sub>2</sub>O vapor at 90°C for 24 h.

## 7. Response and recovery transients of BMNF17 and BMNF33 in synthetic air

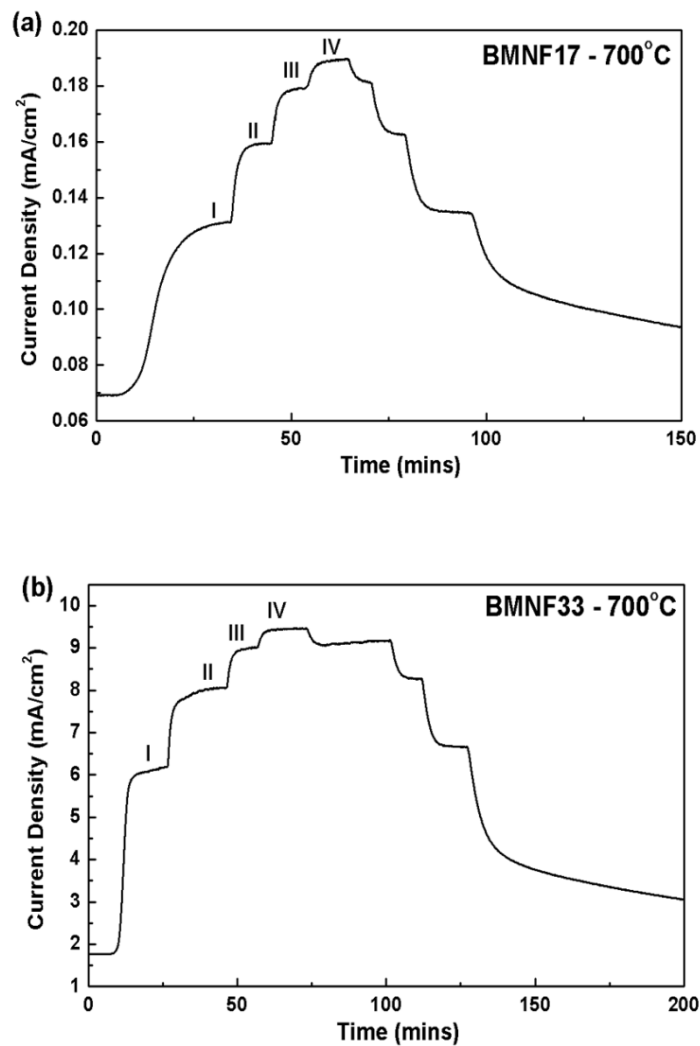

5

10

Figure S6. Response and recovery transients of (a) BMNF17 and (b) BMNF33 at various concentrations of dry synthetic air (21% O<sub>2</sub> in N<sub>2</sub>) at 700 °C (Applied voltage = 0.1V). I, II, III and IV represent synthetic air concentrations corresponding to their 100, 500, 1000 and 1500 ppm of CO<sub>2</sub> balanced in dry synthetic air counterpart purged inside the gas-tight quartz cell, respectively.
